# Supplementary material for: Toxicity of various kinds of ionic liquids towards the cell growth and end product formation of the probiotic strain, Propionibacterium freudenreichii
Source: Royal Society of Chemistry journal article supplement (doi:10.1039/c4ra00925h), 2014-01-01
Supplement: c4ra00925h1.pdf [file c4ra00925h1.pdf]

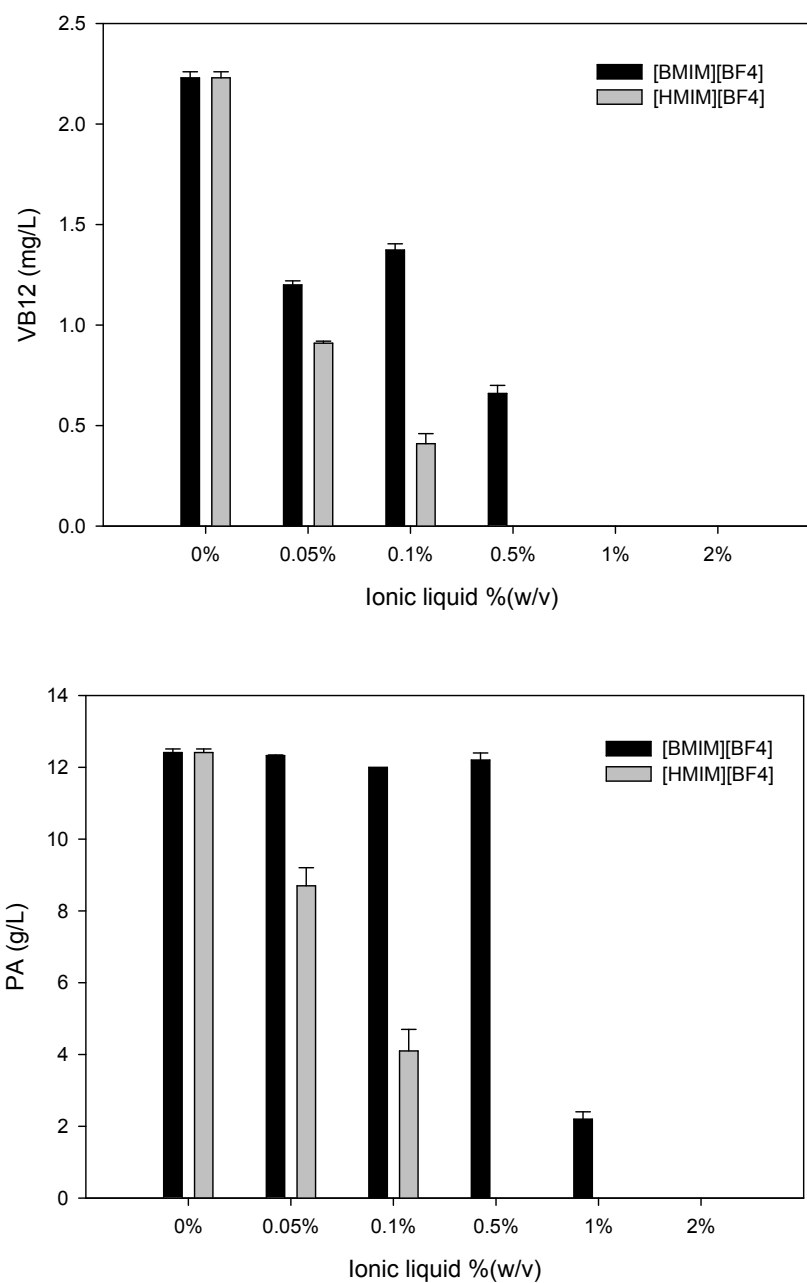

Fig. S1. Effect of [BMIM][BF<sub>4</sub>] and [HMIM][BF<sub>4</sub>] on vitamin B<sub>12</sub> and propionic acid biosynthesis by *P. freudenreichii*. Data are mean values  $\pm$  standard deviation of three replicates. Vertical bars on the columns are  $\pm$ SD of the mean.

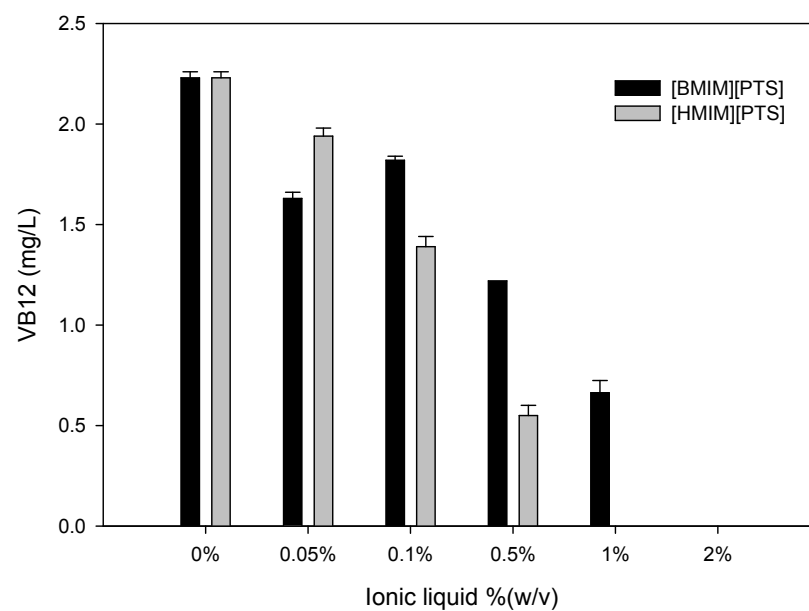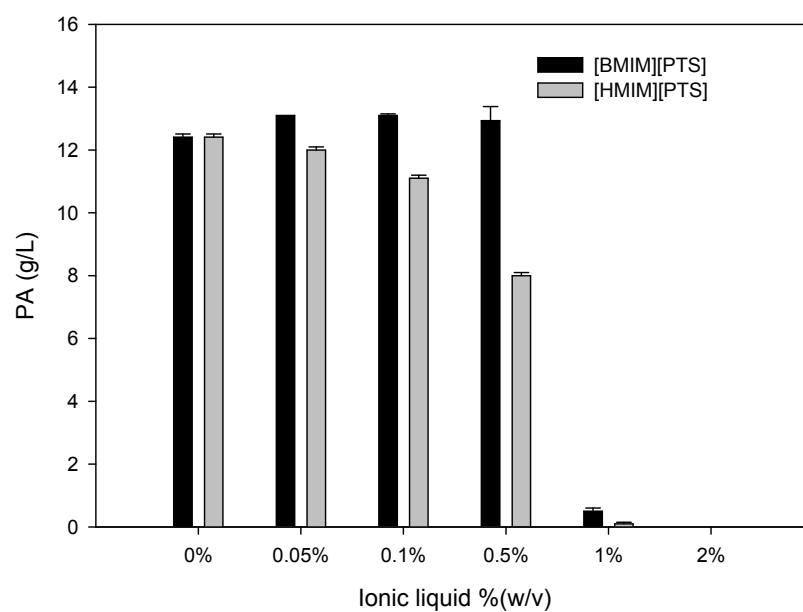

Fig. S2. Effect of [BMIM][BTS] and [HMIM][PTS] on vitamin B<sub>12</sub> and propionic acid biosynthesis by *P. freudenreichii*. Data are mean values ± standard deviation of three replicates. Vertical bars on the columns are ±SD of the mean.

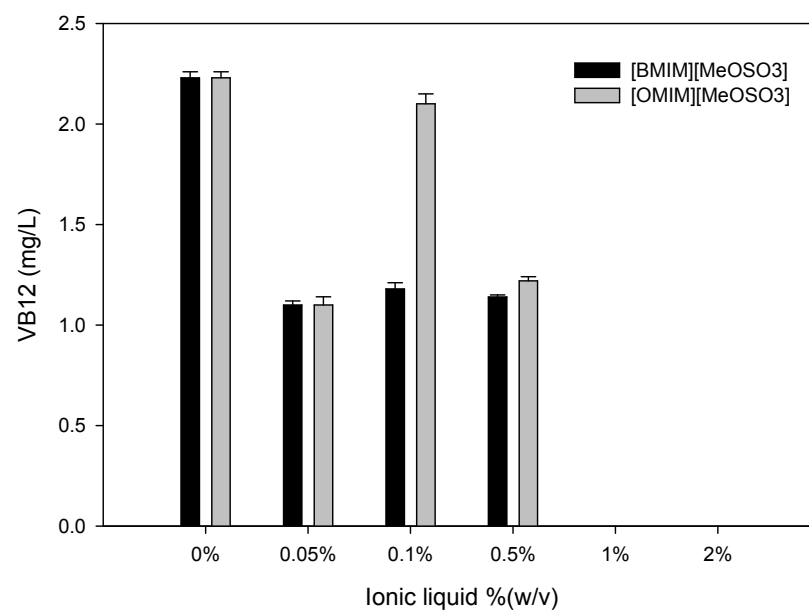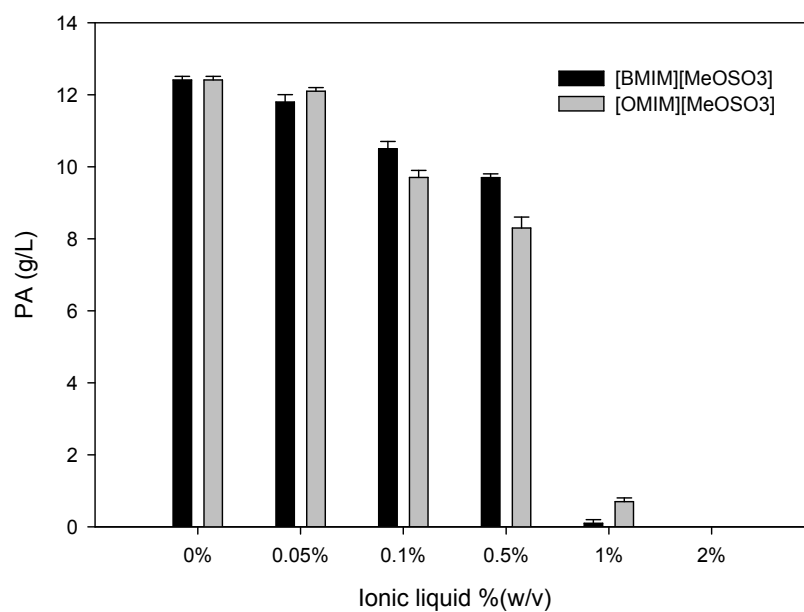

Fig. S3. Effect of [BMIM][MeOSO<sub>3</sub>] and [OMIM][MeOSO<sub>3</sub>] on vitamin B<sub>12</sub> and propionic acid biosynthesis by *P. freudenreichii*. Data are mean values  $\pm$  standard deviation of three replicates. Vertical bars on the columns are  $\pm$ SD of the mean.

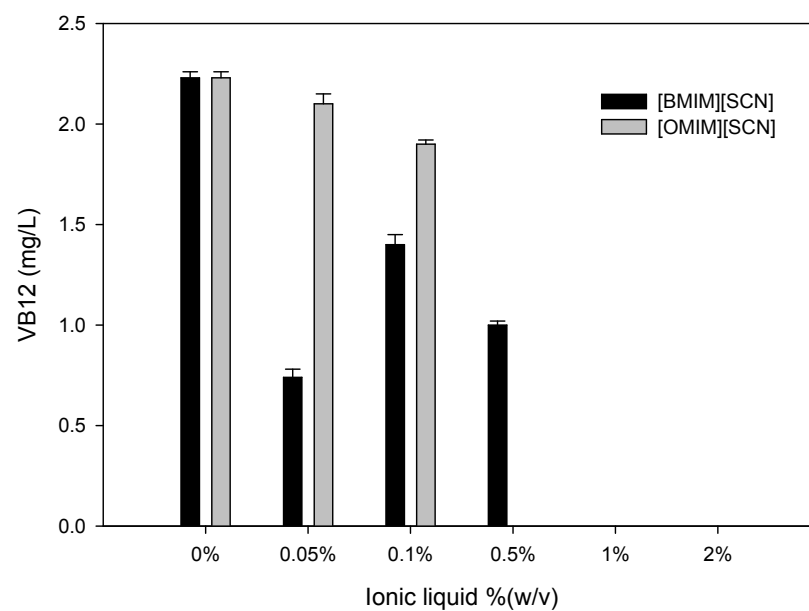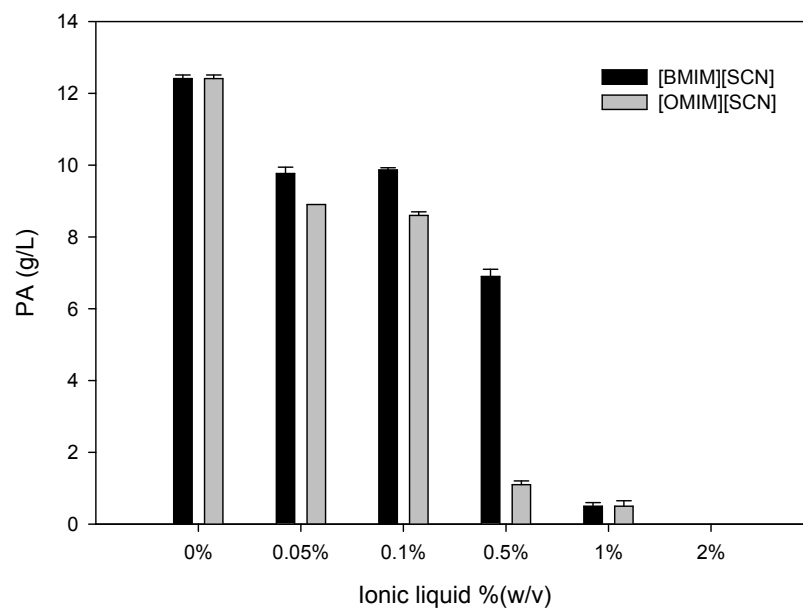

Fig. S4. Effect of [BMIM][SCN] and [OMIM][SCN] on vitamin B<sub>12</sub> and propionic acid biosynthesis by *P. freudenreichii*. Data are mean values  $\pm$  standard deviation of three replicates. Vertical bars on the columns are  $\pm$ SD of the mean.

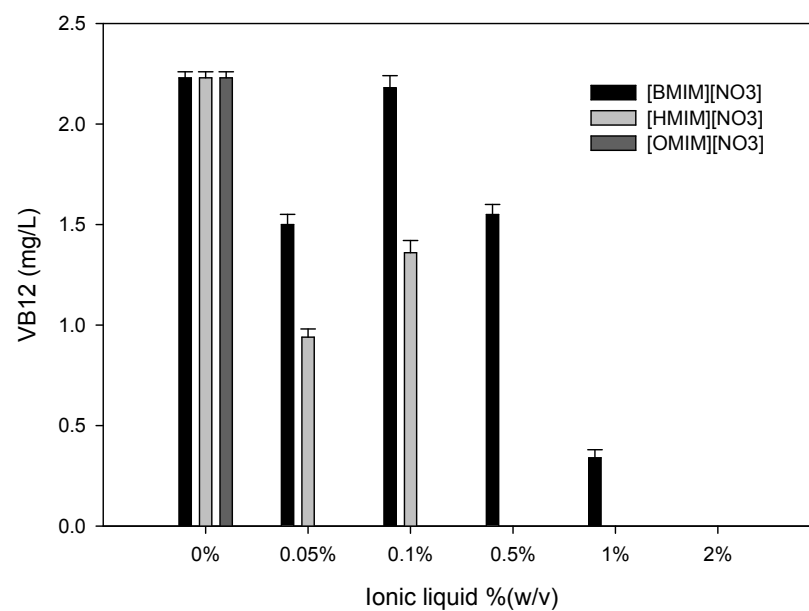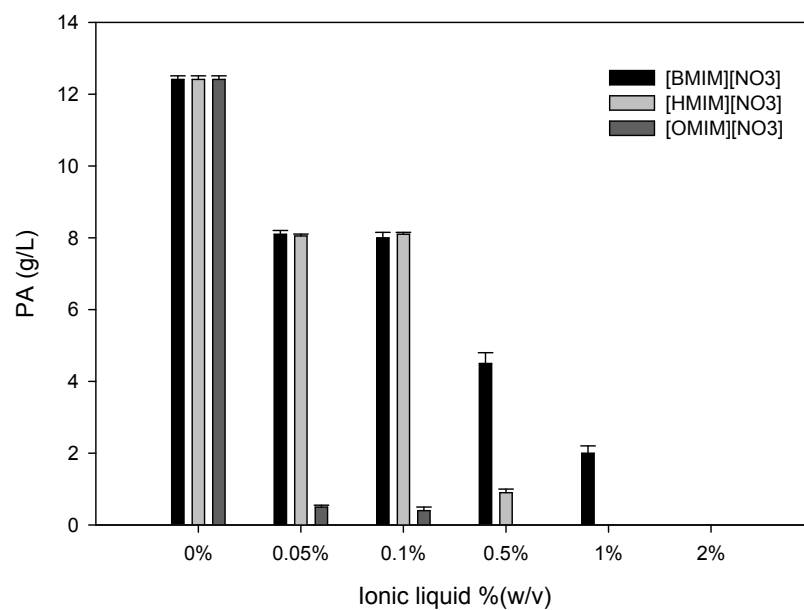

Fig. S5. Effect of [BMIM][NO<sub>3</sub>], [HMIM][NO<sub>3</sub>] and [OMIM][NO<sub>3</sub>] on vitamin B<sub>12</sub> and propionic acid biosynthesis by *P. freudenreichii*. Data are mean values  $\pm$  standard deviation of three replicates. Vertical bars on the columns are  $\pm$ SD of the mean.

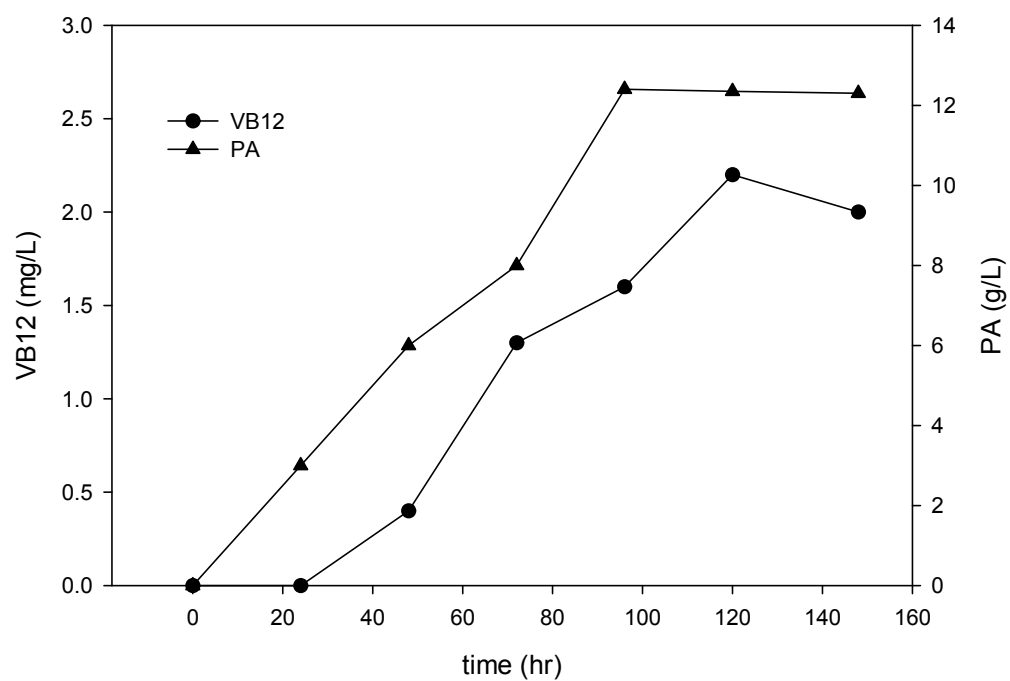

Fig. S6. The amount of VB12 and PA production over time by *P. freudenreichii*. Maximum production of VB12 is at 120 hr.
